# Supplementary material
Source: publisher figshare collection journal article supplement (https://sage.figshare.com/articles/dataset/_/20210662)
Supplement: Supplementary file 1 [file 1]

sj-pdf-1-imr-10.1177\_03000605221108924 - Supplemental material for Natural killer cell activity as a biomarker for the diagnosis of lung cancer in high-risk patients 

Browse

Browse and SearchSearch

Explore more content

sj-pdf-1-imr-10.1177\_03000605221108924.pdf (158.61 kB)

File infoThis item contains files with download restrictions

Fullscreen

# sj-pdf-1-imr-10.1177\_03000605221108924 - Supplemental material for Natural killer cell activity as a biomarker for the diagnosis of lung cancer in high-risk patients

CiteDownload (158.61 kB)ShareEmbed

journal contribution

 posted on 2022-07-01, 12:15 authored by Morten Borg, Sara Witting Christensen Wen, Torben Frøstrup Hansen, Anders Jakobsen, Rikke Fredslund Andersen, Ole Hilberg, Ulla Møller Weinreich, Line Nederby

Supplemental material, sj-pdf-1-imr-10.1177\_03000605221108924 for Natural killer cell activity as a biomarker for the diagnosis of lung cancer in high-risk patients by Morten Borg, Sara Witting Christensen Wen, Torben Frøstrup Hansen, Anders Jakobsen, Rikke Fredslund Andersen, Ole Hilberg, Ulla Møller Weinreich and Line Nederby in Journal of International Medical Research

## Funding

### Region of Southern Denmark

## History

## Usage metrics


## Categories

- Health and Community Services
- Cardiology
- Dentistry not elsewhere classified
- Emergency Medicine
- Endocrinology
- Geriatrics and Gerontology
- Neurology and Neuromuscular Diseases
- Nursing not elsewhere classified
- Nutrition and Dietetics not elsewhere classified
- Oncology and Carcinogenesis not elsewhere classified
- Orthopaedics
- Sports Medicine
- Otorhinolaryngology
- Aged Health Care
- Paediatrics
- Pharmacology and Pharmaceutical Sciences not elsewhere classified
- Psychology not elsewhere classified
- Psychiatry (incl. Psychotherapy)
- Public Health and Health Services not elsewhere classified
- Respiratory Diseases
- Sociological Methodology and Research Methods
- Surgery

## Keywords

Natural killer celllung cancerinterferon gammascreeningbiomarkerhigh-risk

## Licence

CC BY-NC 4.0

## Exports

Select an option

RefWorksRefWorks

BibTeXBibTeX

Ref. managerRef. manager

EndnoteEndnote

DataCiteDataCite

NLMNLM

DCDC

Hide footer

AboutFeaturesToolsBlogKnowledgeContactHelpPrivacy PolicyCookie PolicyTermsDisclaimerSitemap

fig**share**. credit for  **all**  your research.
